# Supplementary material for: A prospective, observational study of patients with uncommon distal symmetric painful small-fiber neuropathy
Source: PLoS One. 2017 Sep 28;12(9):e0183948. doi: 10.1371/journal.pone.0183948 (PMC5619719; doi:10.1371/journal.pone.0183948)
Supplement: S1 Data — (XLS) [file pone.0183948.s001.xls]

## Sheet: cryoglobulin
Duration (month)	Age	Sex	260/280	260/230	ug/ml	ID PAIN	DN4	VAS	DBS	TTR	result	result	SSABresult	Hepatitis virus	ANA	ADNA	RF	NCS	QST	result	result	result	result
1	49	M			100	4	9	5	-	-	IgM(+)				negative	negative	negative	normal		normal	-	normal	normal	normal
1	23	F			100	3	3	4	-	#REF!	IgG(+),IgM(+)				negative		negative			normal	-	-	-
2	28	M	1.85	2.32	3708.4	1	1	8	Slightly low acid alpha-galactosodase A activity		IgM(+)				negative		negative			-	-	-	-
2	70	F	1.86	2.34	3246	1	1	7	-		Positive IgM(1+)	-						normal		-	-	This study suggests dysfunction of the cardiovascular autonomic reflex.	The study suggests sudomotor dysfunction of bilateral upper limb and bilateral lower limb.	normal
2	71	F	1.87	2.34	2711.8	2	2	8	-		IgG(+),IgM(+),IgA(+)	-		HCV				normal		-	-	-		normal
1	60	M	1.87	2.4	1707.9	3	3	7	-		positive IgG(2+), IgA(1+), IgM(1+)	SSA7; SSB10	positive		negative	negative	negative	abnormal		Abnormal: This abnormal CPT study suggests dysfunction of A beta-fibers in right side index. left side index,toe. A delta-fibers in right side index. left side index,toe. C-fiber in left side index	-	This study suggests dysfunction of the cardiovascular autonomic reflex.	The study suggests sudomotor dysfunction of bilateral upper limb and bilateral lower limb.	abnormal
1	65	F	1.77	2.1	4371.5	2	3	9	-		IgG(+),IgM(+), IgA(+)	SSA-, SSB -	negative		negative		negative			-	-	normal	normal
3	48	F	1.81	2.05	4154.3	1	3	8	-		IgM(+)			no B,C				normal		-	-	-	-	normal
1	76	F	1.87	1.95	750.5	2	2	8	-		IgG(+), IgM(+), IgA(+)			HBV, no HCV	negative			abnormal	abnormal	-	Right Upper Limb Warm Perception:Hypoesthesia	This study suggests dysfunction of the cardiovascular autonomic reflex.	The study suggests sudomotor dysfunction of right upper limb and bilateral lower limb.	abnormal
1	62	M	1.87	2.24	2775.2	2	3	7			IgG(+), IgM(+), IgA(+)				negative	negative	negative	normal		-	-	-	-	normal
18	37	M	1.88	2.27	1866.6	5	7	3			IgM(+)	SSA 4; SSB4	positive		positive	negative		normal	abnormal	-	Left Lower Limb Cold Perception: Hypoesthesia Warm Perception: Hypoesthesia	This study suggests dysfunction of the cardiovascular autonomic reflex.	normal	normal
1	32	M				1	1	6			IgG(+), IgA(+), IgM(+)									-	-	-	-
3	43	M				1	3	6			IgG(+), IgA(+), IgM(+)				negative	negative	negative	normal	normal	Abnormal: This abnormal CPT study suggests dysfunction of A beta-fibers in left side trigeminal. A delta-fibers in right side trigeminal. C-fiber in right side trigeminal.	normal	normal	normal	normal
1	71	M				2	3	7			IgM(+)				negative	negative	negative	normal	normal	-	normal	-	-	normal
22	65	M				4	6	5			positive IgG(1+), IgA(1+), IgM(1+)								normal	-	normal	-	-
10	55	M									IgG(2),IgA(2),IgM(+)				negative		negative
17	46	M			100	3	4	2	-	-	negative							normal		normal	-	normal	normal	radiculopathy
48	56	F			100	4	6	9	-	-	negative	SSA8;SSB9	positive		negative		negative	normal	normal	This abnormal CPT study suggests dysfunction of Adelta-fibers in both side trigeminal. C-fiber in both side trigeminal.	normal	This study suggests dysfunction of the cardiovascular autonomic reflex.	-	normal
34	65	M			100	4	8	6	-	-	negative	SSA16 ;SSB 9	positive	no B,C	negative	negative	negative	normal		delta	-	normal	normal	normal
49	49	F			100	2	3	5	-	-	negative	SSA21 ; SSB 4	positive		negative		negative	normal		delta	-	-	-	normal
6	65	M			100	2	3	5	-	+	negative							abnormal		-	-	-	These SSR studies suggested sympathetic sudomotor dysfunction over all four limbs and please correlate with clinical features.	abnormal-MND
3	36	M			100	3	3	4	-	-	negative							normal		-	-	-	-	normal
1	41	M	1.83	2.29	4055.5	1	1	8	-		negative	SSA8; SSB44	positive		negative		negative	normal		-	-	-	-	normal
1	41	F	1.88	2.36	3177.9	1	1	6	-		negative	SSA 5; SSB11	positive		negative	negative	negative	normal		-	-	-	-	normal
1	58	F	1.87	2.35	3116	4	4	5	-		negative	-								-	-	-	-
1	50	M				1	1	7	-	-	negative									-	-	-	-
2	54	M	1.86	2.3	3158.9	2	2	7	-		negative	-						abnormal		-	-	-	-	abnormal
2	63	F	1.89	2.38	859.6	5	4	8	-		negative	SSA 22; SSB14	positive		negative	negative	negative	normal	abnormal	normal	R limb Cold Perception: Hypoesthesia	This study suggests dysfunction of the cardiovascular autonomic reflex.	normal	normal
1	33	M	1.82	1.79	287.6	0	0	8	-		negative							normal		-	-	-	-	normal
2	71	M	1.8	2.14	4059.4	1	1	6	-		negative				negative		negative	normal		-	-	-	-	normal
17	36	F	1.78	2.12	4277.4	0	0	6	-		negative	-	negative							-	-	-	-
36	81	M	1.81	2.1	3946.6	1	1	0	-		negative	-	negative		negative		negative	normal		-	-	-	-	normal
14	60	M	1.83	2.17	3814.2	1	1	7	-		negative				negative		negative	normal		normal	-	normal	normal	normal
2	82	M	1.87	2.55	2102.8	7	4	8	-		negative				negative		negative	normal		-	-	normal	normal	normal
36	60	F	1.88	2.25	2046.7	4	4	10	-		negative				negative		negative	normal		normal	-	normal	normal	normal
9	43	M	1.87	2.26	2714.6	4	5	5			negative			HBV, no HCV	negative	negative	positive	normal		-	-	-	-	normal
1	32	M	1.87	2.25	2356.5	1	2	6			negative				negative		negative	normal		-	-	-	-	normal
3	47	M	1.88	2.26	1991	1	2	6			negative							abnormal		-	-	-	-	abnormal
34	62	F	1.87	2.28	2484	4	4	3			negative	SSA26;SSB5	positive	HBV, no HCV	negative		negative	normal	normal	normal	normal	This study shows normal parsympathetic cardiovascular responses.	The study suggests sudomotor dysfunction of right upper limb and normal sudomotor function of bilateral lower limb.	normal
1	32	F	1.88	2.27	386.8	1	2	1			negative				negative		negative				-	-	-
22	58	M				2	2	3			negative	??	negative		negative		negative			Abnormal: This abnormal CPT study suggests dysfunction of Abeta-fibers in left side index. Adelta-fibers in left side index.	Abnormal: This abnormal CPT study suggests dysfunction of Abeta-fibers in left side index. Adelta-fibers in left side index.	-	-
3	19	M				1	1	3			negative				negative		negative	normal	normal	-	normal	-	-	normal
31	54	F				4	4	7			negative				negative		negative	normal	normal	normal	normal	This study suggests dysfunction of the cardiovascular autonomic reflex.	The study suggests sudomotor dysfunction of bilateral upper limbs and bilateral lower limbs.	normal
9	29	M				2	3	8			negative	-	negative		negative		negative	normal		-	-	-	-	normal
2	52	M				1	1	6			negative	-	negative	no B,C	negative	negative	negative	normal	abnormal	-	Left Lower Limb Warm Perception: Hypoesthesia	normal	normal	normal
37	44	M				3	3	8	-	-	negative	-	negative		negative		negative	normal		delta	-	normal	normal	normal
1	56	M				3	7	4			negative							normal		-	-	-	-	normal
11	59	M				3	5	2			negative				negative	negative	negative	normal	normal	Abnormal: This abnormal CPT study suggests dysfunction of A beta-fibers in right side index,toe. left side toe. A delta-fibers in both side index,toes. C-fiber in both side index.	normal	This study suggests dysfunction of the cardiovascular autonomic reflex.	normal	normal
1	76	M				3	4	6			negative				negative		negative	normal		Abnormal: This abnormal CPT study suggests dysfunction of A beta-fibers in right side toe.	-	This study suggests dysfunction of the cardiovascular autonomic reflex.	The study suggests sudomotor dysfunction of bilateral upper limbs and bilateral lower limbs.	normal
4	69	M				2	5	7			negative							normal		-	-	-	-	normal
27	66	M				2	4	2			negaive	-						normal		-	-	-	-	normal
29	84	M				3	5	5			negative	SSA9; SSB8	positive		negative		negative	abnormal	abnormal	Abnormal: This abnormal CPT study suggests dysfunction of A beta-fibers in the both hands. A delta-fibers in the both hands. C-fiber in the right hand.	R AND L UPPER LIMBS Warm perception: Hypoesthesia	This study suggests dysfunction of the cardiovascular autonomic reflex.	The study suggests sudomotor dysfunction of bilateral upper limbs and BILATERAL LOWER LIMBS	abnormal
29	58	M				1	3	5			negative				negative		negative	normal		A beta-fibers in right side index. A delta-fibers in right side index.	-	normal	normal	normal
10	31	F				3	6	4			negative				negative	negative	negative	normal	normal	Abnormal: This abnormal CPT study suggests dysfunction of C-fiber in left side index.	normal	-	normal	normal

## Sheet: Sheet1
Age	Sex	260/280	260/230	ug/ml	ID PAIN	DN4	VAS	DBS	TTR	result	result	result	result	result
33	F			100	4	5	9	-	-		-
52	F			100	1	0	4	-	-		-
50	F			100	2	5	6	-	-		-	-	-	-
56	F			100	4	6	9	-	-	SSA8;SSB9	This abnormal CPT study suggests dysfunction of Adelta-fibers in both side trigeminal. C-fiber in both side trigeminal.	normal	This study suggests dysfunction of the cardiovascular autonomic reflex.	-
46	F			100	2	2	9	-	-		-	-	-	-
49	F			100	2	3	5	-	-	SSA21 ; SSB 4	delta	-	-	-
23	F			100	3	3	4	-	#VALUE!		normal	-	-	-
70	F			100	0	1	4	-	-		delta, beta, c-fiber	-	-	-
59	F	1.87	2.33	2000	4	4	8	-			-	-	-	-
55	F	1.88	2.32	2034.1	1	1	9	-			-	-	-	-
41	F	1.88	2.36	3177.9	1	1	6	-		SSA 5; SSB11	-	-	-	-
70	F	1.86	2.34	3246	1	1	7	-		-	-	-	This study suggests dysfunction of the cardiovascular autonomic reflex.	The study suggests sudomotor dysfunction of bilateral upper limb and bilateral lower limb.
71	F	1.87	2.34	2711.8	2	2	8	-		-	-	-	-
58	F	1.87	2.35	3116	4	4	5	-		-	-	-	-	-
63	F	1.89	2.38	859.6	5	4	8	-		SSA 22; SSB14	normal	R limb Cold Perception: Hypoesthesia	This study suggests dysfunction of the cardiovascular autonomic reflex.	normal
52	F	1.85	2.31	3232.3	2	2	10	-			-		-	-
56	F	1.67	1.26	38	0	0	8	-			-	-	-	-
32	F	1.75	2.08	4497.6	3	0	8	-			-	-	-	-
65	F	1.77	2.1	4371.5	2	3	9	-			-	-	normal	normal
36	F	1.78	2.12	4277.4	0	0	6	-		-	-	-	-	-
48	F	1.81	2.05	4154.3	1	3	8	-			-	-	-	-
61	F	1.8	2.13	4215.3	4	3	9	-			-	-	-	-
76	F	1.87	1.95	750.5	2	2	8	-			-	Right Upper Limb Warm Perception:Hypoesthesia	This study suggests dysfunction of the cardiovascular autonomic reflex.	The study suggests sudomotor dysfunction of right upper limb and bilateral lower limb.
60	F	1.88	2.25	2046.7	4	4	10	-			normal	-	normal	normal
47	F	1.88	2.28	2136.3	1	2	6			SSA 18; SSB 8	-	-	-	-
33	F	1.88	2.27	2283.4	2	2	7				-	-	-	-
62	F	1.87	2.28	2484	4	4	3			SSA26;SSB5	normal	normal	This study shows normal parsympathetic cardiovascular responses.	The study suggests sudomotor dysfunction of right upper limb and normal sudomotor function of bilateral lower limb.
55	F				1	1	8	-	-		-	-	-	-
32	F	1.88	2.27	386.8	1	2	1					-	-	-
54	F				4	4	7				normal	normal	This study suggests dysfunction of the cardiovascular autonomic reflex.	The study suggests sudomotor dysfunction of bilateral upper limbs and bilateral lower limbs.
48	F				1	1	7	-	-		-	-	-	-
61	F				2	6	6				-	-	-	-
30	F				0	0	8	-	-	-	-	-	-	-
31	F				3	6	4				Abnormal: This abnormal CPT study suggests dysfunction of C-fiber in left side index.	normal	-	normal
39	M			100	0	0	3	-	-		-
46	M			100	3	4	2	-	-		normal	-	normal	normal
29	M			100	3	7	4	-	-		-	-	-	-
49	M			100	4	9	5	-	-		normal	-	normal	normal
49	M			100	0	0	0	-	-		-	-	-	-
65	M			100	4	8	6	-	-	SSA16 ;SSB 9	delta	-	normal	normal
72	M			100	3	3	6	-	-	-	beta,delta	-	-	-
35	M			100	3	7	8	-	-		normal	-	-	-
65	M			100	2	3	5	-	+		-	-	-	These SSR studies suggested sympathetic sudomotor dysfunction over all four limbs and please correlate with clinical features.
36	M			100	3	3	4	-	-		-	-	-	-
41	M	1.83	2.29	4055.5	1	1	8	-		SSA8; SSB44	-	-	-	-
28	M	1.85	2.32	3708.4	1	1	8	Slightly low acid alpha-galactosodase A activity			-	-	-	-
60	M	1.88	2.41	2075.2	2	2	4	-		-	-	-	-	-
50	M				1	1	7	-	-		-	-	-	-
54	M	1.86	2.3	3158.9	2	2	7	-		-	-	-	-	-
60	M	1.87	2.4	1707.9	3	3	7	-		SSA7; SSB10	Abnormal: This abnormal CPT study suggests dysfunction of A beta-fibers in right side index. left side index,toe. A delta-fibers in right side index. left side index,toe. C-fiber in left side index	-	This study suggests dysfunction of the cardiovascular autonomic reflex.	The study suggests sudomotor dysfunction of bilateral upper limb and bilateral lower limb.
32	M	1.66	1.47	32.5	1	1	3	-			-	-	-	-
33	M	1.82	1.79	287.6	0	0	8	-			-	-	-	-
71	M	1.8	2.14	4059.4	1	1	6	-			-	-	-	-
37	M				1	1	3	Slightly low acid alpha-galactosodase A activity	-		-	-	-	-
81	M	1.81	2.1	3946.6	1	1	0	-		-	-	-	-	-
37	M	1.79	2.1	4192	1	1	10	-			-	-	-	-
63	M	1.81	2.14	4186	1	9	4	-			-	-	-	-
60	M	1.83	2.17	3814.2	1	1	7	-			normal	-	normal	normal
82	M	1.87	2.55	2102.8	7	4	8	-			-	-	normal	normal
35	M	1.87	2.26	2337.3	3	3	7	-			-	-	-	-
62	M	1.87	2.24	2775.2	2	3	7				-	-	-	-
43	M	1.87	2.26	2714.6	4	5	5				-	-	-	-
32	M	1.87	2.25	2356.5	1	2	6				-	-	-	-
47	M	1.88	2.26	1991	1	2	6				-	-	-	-
37	M	1.88	2.27	1866.6	5	7	3			SSA 4; SSB4	-	Left Lower Limb Cold Perception: Hypoesthesia Warm Perception: Hypoesthesia	This study suggests dysfunction of the cardiovascular autonomic reflex.	normal
58	M				2	2	3			* Anti-SSA : ( - ) _ AU/ml * Anti-SSB : ( - ) _ AU/ml	Abnormal: This abnormal CPT study suggests dysfunction of Abeta-fibers in left side index. Adelta-fibers in left side index.	Abnormal: This abnormal CPT study suggests dysfunction of Abeta-fibers in left side index. Adelta-fibers in left side index.	-	-
57	M				1	3	9			SSA5; SSB5	normal	normal	-	-
32	M				1	1	6				-	-	-	-
19	M				1	1	3				-	normal	-	-
53	M				0	0	8				-	-	-	-
54	M				3	2	4				-	-	-	-
33	M				1	1	8			-	-	-	-	-
29	M				2	3	8			-	-	-	-	-
43	M				1	3	6				Abnormal: This abnormal CPT study suggests dysfunction of A beta-fibers in left side trigeminal. A delta-fibers in right side trigeminal. C-fiber in right side trigeminal.	normal	normal	normal
44	M				1	1	*			-	-	-	-	-
52	M				1	1	6			-	-	Left Lower Limb Warm Perception: Hypoesthesia	normal	normal
44	M				3	3	8	-	-	-	delta	-	normal	normal
56	M				3	7	4				-	-	-	-
48	M				4	5	4				-	-	Normal SSR latency and amplitude in all limbs following left median nerve stimulation.	normal
71	M				2	3	7				-	normal	-	-
59	M				3	5	2				Abnormal: This abnormal CPT study suggests dysfunction of A beta-fibers in right side index,toe. left side toe. A delta-fibers in both side index,toes. C-fiber in both side index.	normal	This study suggests dysfunction of the cardiovascular autonomic reflex.	normal
76	M				3	4	6				Abnormal: This abnormal CPT study suggests dysfunction of A beta-fibers in right side toe.	-	This study suggests dysfunction of the cardiovascular autonomic reflex.	The study suggests sudomotor dysfunction of bilateral upper limbs and bilateral lower limbs.
48	M				1	3	4			SSA7; SSB5	-	-	-	-
31	M				4	4	8				-	-	-	-
69	M				2	5	7				-	-	-	-
56	M				4	7	9				-	The EMG and NCV studies suggest bilateral mild carpal tunnel syndromes superimposed on a length-dependent, sensory-motor polyneuropathy with predominant features of demyelination.	-	-
66	M				2	4	2			-	-	-	-	-
52	M				0	0	7				*	*	*	*
65	M				4	6	5				-	normal	-	-
84	M				3	5	5			SSA9; SSB8	Abnormal: This abnormal CPT study suggests dysfunction of A beta-fibers in the both hands. A delta-fibers in the both hands. C-fiber in the right hand.	R AND L UPPER LIMBS Warm perception: Hypoesthesia	This study suggests dysfunction of the cardiovascular autonomic reflex.	The study suggests sudomotor dysfunction of bilateral upper limbs and BILATERAL LOWER LIMBS
35	M				2	4	2				-	normal	-	-
58	M				1	3	5				A beta-fibers in right side index. A delta-fibers in right side index.	-	normal	normal
47	M				0	0	5	-	-		-	-	-	-
34	M				4	7	7				-	-	-	-
35	M				3	6	8				-	Left Lower Limb Warm Perception: Hypoesthesia Cold Perception: Hyperesthesia Right Lower Limb Warm Perception: Hypoesthesia Cold Perception: Hyperesthesia	-	-
35	M				3	3	6				-	-	-	-
67	M				3	4	4				-	Left lower Limb Warm Perception: Hypoesthesia Cold Perception: Hyperesthesia	-	-
64	F				3	4	5				-
63	M				2	4	4				-
67	M				4	4	5				-
